# Supplementary material for: Sol–gel-derived hard coatings from tetraethoxysilane and organoalkoxysilanes bearing zwitterionic and isothiazolinone groups and their antifouling behaviors
Source: Royal Society of Chemistry journal article supplement (doi:10.1039/d1tb02069b), 2021-12-02
Supplement: d1tb02069b1.pdf [file d1tb02069b1.pdf]

Electronic Supplementary Material (ESI) for Journal of Materials Chemistry B.  
This journal is © The Royal Society of Chemistry 2021

## Supporting Information

### **Sol-gel-derived hard coatings from tetraethoxysilane and organoalkoxysilanes bearing zwitterionic and isothiazolinone groups and their antifouling behaviors**

Jinyan Tan,<sup>a</sup> Xiao Liang,<sup>b</sup> Jinlong Yang,<sup>\*b</sup> and Shuxue Zhou<sup>\*a</sup>

*<sup>a</sup>Department of Materials Science, State Key Laboratory of Molecular Engineering of Polymers, Advanced Coatings Research Center of Ministry of Education of China, Fudan University, Shanghai 200433, China.*

*<sup>b</sup>International Research Center for Marine Biosciences, Ministry of Science and Technology, Shanghai Ocean University, Shanghai 201306, China.*

\* Corresponding Authors

Jinlong Yang, E-mail: [jlyang@shou.edu.cn](mailto:jlyang@shou.edu.cn)

Shuxue Zhou, E-mail: [zhoushuxue@fudan.edu.cn](mailto:zhoushuxue@fudan.edu.cn)

**Figure S1**

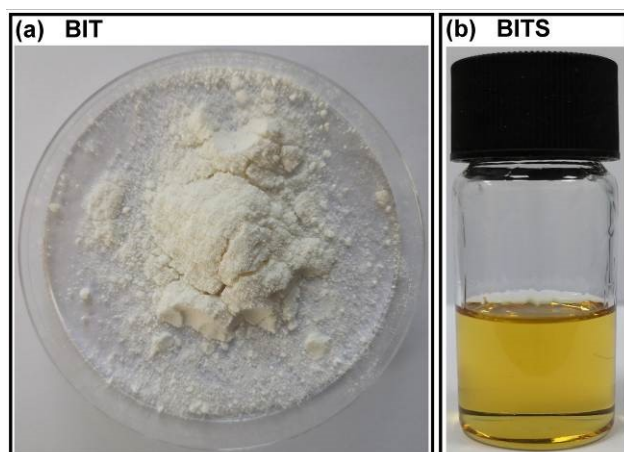

**Fig. S1** Photos of (a) BIT and (b) BITS.

**Figure S2**

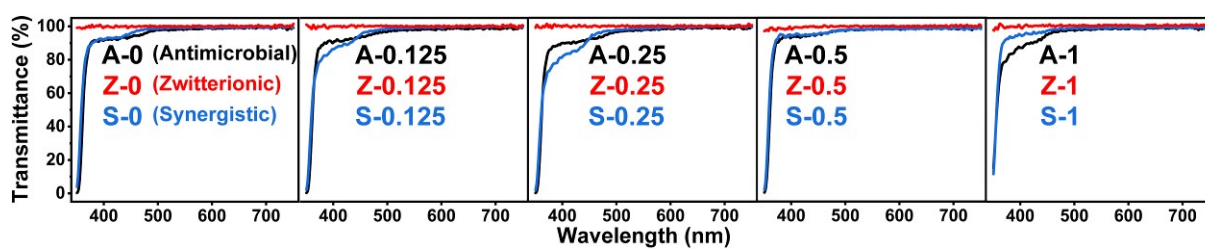

**Fig. S2** UV-Vis transmittance spectra of A- $\chi$ , Z- $\chi$  and S- $\chi$  coatings.

**Figure S3**

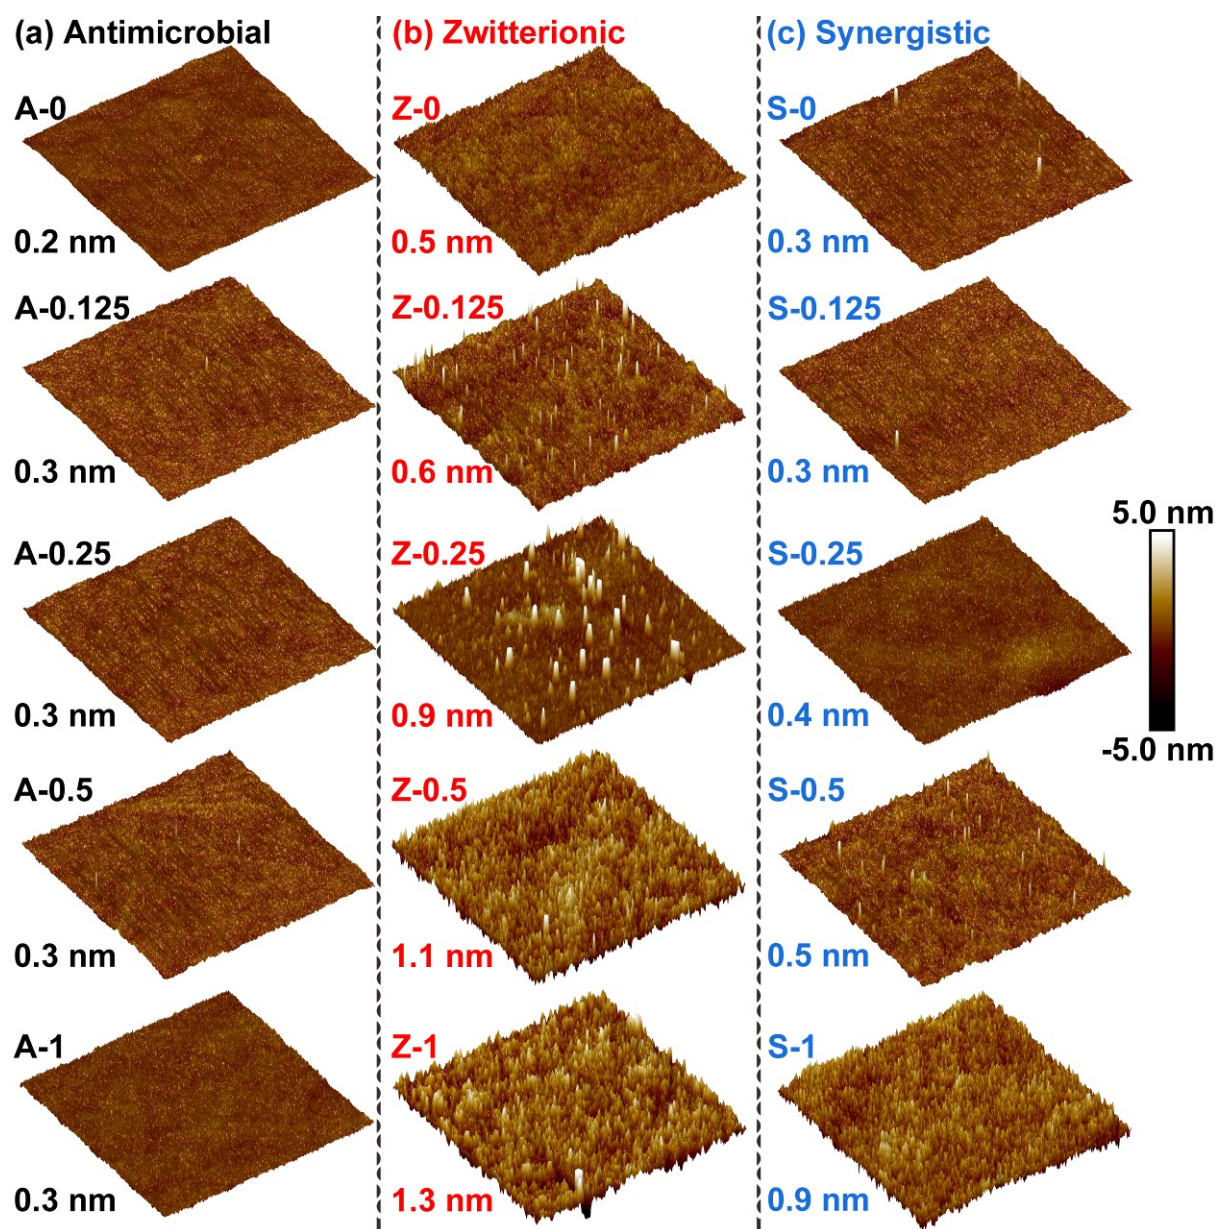

**Fig. S3** AFM height images (5  $\mu\text{m} \times 5 \mu\text{m}$ ) and the corresponding  $R_q$  values of (a) A- $\chi$ , (b) Z- $\chi$  and (c) S- $\chi$  coatings.

**Figure S4**

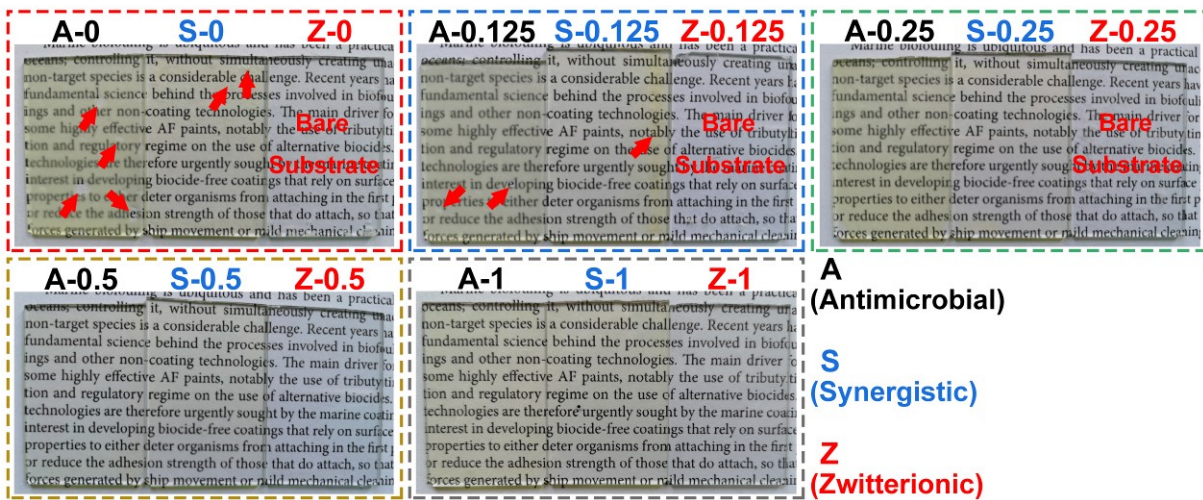

**Fig. S4** Photos for A- $\chi$ , Z- $\chi$  and S- $\chi$  coatings after immersed in ASW for 9 months (red arrows indicate defects of the coatings).

**Figure S5**

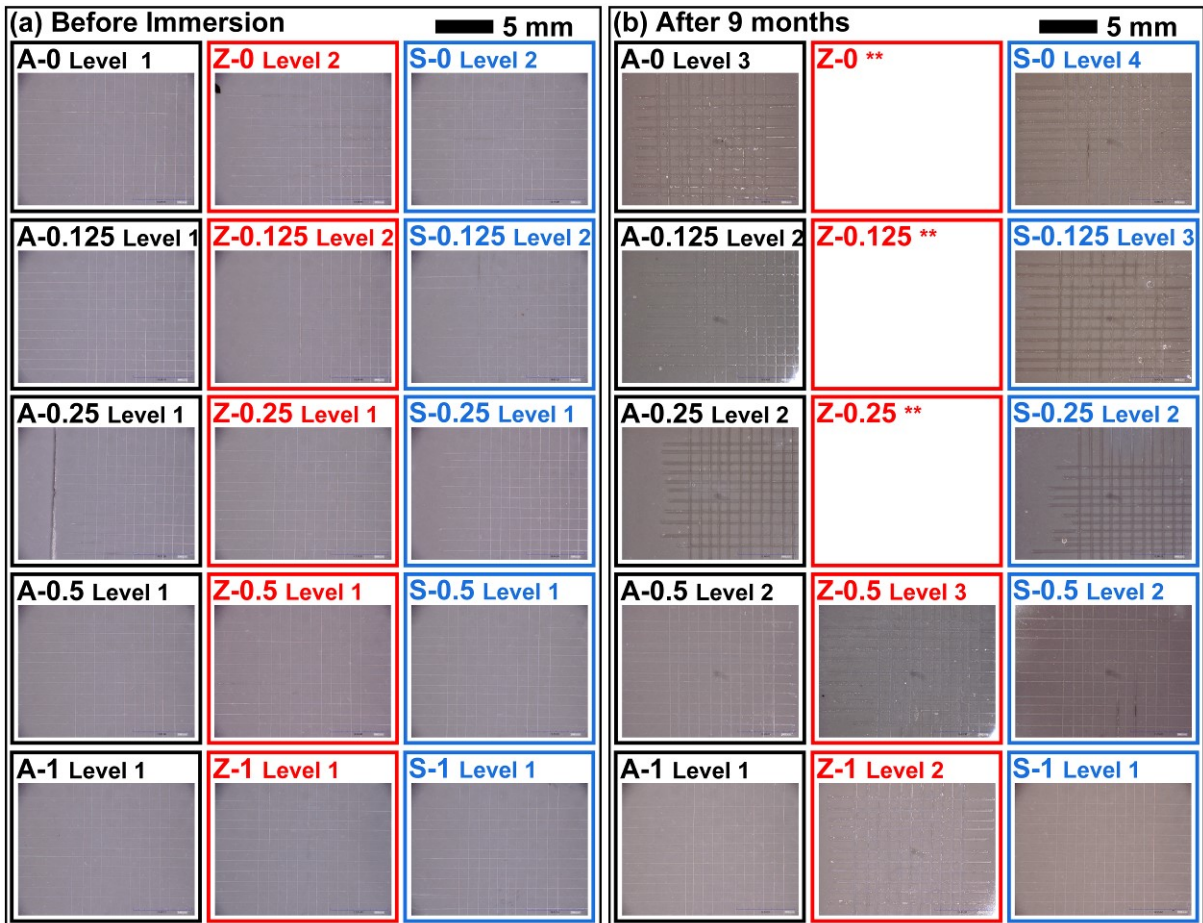

**Fig. S5** Superficial morphology of cross-cut tests for A- $\chi$ , Z- $\chi$  and S- $\chi$  coatings (a) before and (b) after immersed in ASW for 9 months (\*\* indicates that the coatings were disappeared).
